# Supplementary material for: Dairy Cow Behavior Is Affected by Period, Time of Day and Housing
Source: MDPI journal article supplement (doi:10.3390/ani12040512), 2022-02-18
Supplement: s1 [file s1]

Table S3: Means of daily values per farm and per period for lying duration (LD), number of lying bouts (NLB) and mean lying bout duration (MLBD). \* The units for LD and NLB are different than those used for daytime and nighttime values.

| Parameter  | Period    | Farm  |        |       |       |        |       |       |       |
|------------|-----------|-------|--------|-------|-------|--------|-------|-------|-------|
|            |           | A     | B      | C     | D     | E      | F     | G     | H     |
| LD (hr)*   | winter    | 12.00 | 12.81  | 12.47 | 11.21 | 10.94  | 13.59 | 12.03 | 11.66 |
|            | temperate | 9.94  | 9.53   | 9.71  | 11.49 | 9.40   | 9.45  | 11.68 | 13.47 |
|            | summer    | 9.56  | 7.98   | 10.49 | 12.42 | 9.00   | 10.67 | 9.94  | 10.30 |
| NLB (n)*   | winter    | 10.92 | 7.87   | 13.70 | 9.98  | 10.28  | 10.40 | 8.78  | 9.42  |
|            | temperate | 11.20 | 9.22   | 17.28 | 12.87 | 5.78   | 10.12 | 8.60  | 10.63 |
|            | summer    | 10.20 | 8.63   | 15.80 | 12.45 | 6.97   | 10.27 | 8.98  | 9.62  |
| MLBD (min) | winter    | 69.91 | 101.80 | 58.48 | 72.39 | 91.76  | 83.02 | 89.10 | 79.90 |
|            | temperate | 57.43 | 69.33  | 34.78 | 58.98 | 108.76 | 63.66 | 84.23 | 80.54 |
|            | summer    | 60.27 | 59.94  | 42.35 | 63.71 | 85.07  | 65.78 | 77.64 | 68.86 |
