# Supplementary material for: Dairy Cow Behavior Is Affected by Period, Time of Day and Housing
Source: MDPI journal article supplement (doi:10.3390/ani12040512), 2022-02-18
Supplement: s1 [file s1]

Table S1: t- and  $p$ -values of the pairwise comparisons of farms within each period and time of day (Tukey-Kramer test, slice-option). Significant differences ( $p < 0.05$ ) are highlighted in bold.

| Period | Time of day | Farm1 | Farm2 | LD          |                  | NLB          |                  | MLBD         |                  |
|--------|-------------|-------|-------|-------------|------------------|--------------|------------------|--------------|------------------|
|        |             |       |       | t           | $p$              | t            | $p$              | t            | $p$              |
| Winter | Nighttime   | F     | G     | 2.03        | 0.461            | 0.83         | 0.991            | -1.87        | 0.568            |
| Winter | Nighttime   | F     | H     | -1.21       | 0.928            | -0.88        | 0.988            | -2.46        | 0.212            |
| Winter | Nighttime   | F     | C     | 2.35        | 0.269            | -2.54        | 0.181            | 2.74         | 0.111            |
| Winter | Nighttime   | F     | B     | -0.16       | 1.000            | 2.35         | 0.269            | <b>-3.45</b> | <b>0.013</b>     |
| Winter | Nighttime   | F     | E     | 1.55        | 0.782            | -1.50        | 0.805            | <b>-3.35</b> | <b>0.019</b>     |
| Winter | Nighttime   | F     | A     | 0.87        | 0.989            | 1.04         | 0.968            | -0.53        | 1.000            |
| Winter | Nighttime   | F     | D     | 1.29        | 0.901            | <b>3.17</b>  | <b>0.033</b>     | -1.01        | 0.974            |
| Winter | Nighttime   | G     | H     | -2.85       | 0.083            | -1.49        | 0.814            | -0.66        | 0.998            |
| Winter | Nighttime   | G     | C     | 0.62        | 0.999            | -2.98        | 0.058            | <b>4.28</b>  | <b>0.001</b>     |
| Winter | Nighttime   | G     | B     | -1.70       | 0.687            | 1.64         | 0.728            | -1.71        | 0.681            |
| Winter | Nighttime   | G     | E     | -0.42       | 1.000            | -2.08        | 0.428            | -1.42        | 0.849            |
| Winter | Nighttime   | G     | A     | -0.93       | 0.983            | 0.27         | 1.000            | 1.21         | 0.931            |
| Winter | Nighttime   | G     | D     | -0.55       | 0.999            | 2.16         | 0.379            | 0.73         | 0.996            |
| Winter | Nighttime   | H     | C     | <b>3.37</b> | <b>0.017</b>     | -1.68        | 0.703            | <b>4.97</b>  | <b>&lt;0.001</b> |
| Winter | Nighttime   | H     | B     | 0.89        | 0.987            | 3.03         | 0.051            | -1.09        | 0.958            |
| Winter | Nighttime   | H     | E     | <b>3.09</b> | <b>0.043</b>     | -0.58        | 0.999            | -0.79        | 0.994            |
| Winter | Nighttime   | H     | A     | 2.06        | 0.444            | 1.90         | 0.551            | 1.89         | 0.558            |
| Winter | Nighttime   | H     | D     | 2.42        | 0.230            | <b>3.87</b>  | <b>0.003</b>     | 1.40         | 0.857            |
| Winter | Nighttime   | C     | B     | -2.22       | 0.342            | <b>4.30</b>  | <b>&lt;0.001</b> | <b>-5.78</b> | <b>&lt;0.001</b> |
| Winter | Nighttime   | C     | E     | -1.08       | 0.961            | 1.36         | 0.876            | <b>-5.86</b> | <b>&lt;0.001</b> |
| Winter | Nighttime   | C     | A     | -1.54       | 0.786            | <b>3.42</b>  | <b>0.015</b>     | <b>-3.17</b> | <b>0.033</b>     |
| Winter | Nighttime   | C     | D     | -1.31       | 0.896            | <b>6.01</b>  | <b>&lt;0.001</b> | <b>-3.81</b> | <b>0.004</b>     |
| Winter | Nighttime   | B     | E     | 1.46        | 0.827            | <b>-3.62</b> | <b>0.007</b>     | 0.43         | 1.000            |
| Winter | Nighttime   | B     | A     | 0.91        | 0.985            | -1.48        | 0.819            | 2.88         | 0.076            |
| Winter | Nighttime   | B     | D     | 1.25        | 0.917            | 0.20         | 1.000            | 2.41         | 0.238            |
| Winter | Nighttime   | E     | A     | -0.62       | 0.999            | 2.67         | 0.134            | 2.74         | 0.111            |
| Winter | Nighttime   | E     | D     | -0.18       | 1.000            | <b>4.91</b>  | <b>&lt;0.001</b> | 2.22         | 0.339            |
| Winter | Nighttime   | A     | D     | 0.40        | 1.000            | 2.03         | 0.465            | -0.47        | 1.000            |
| Winter | Daytime     | F     | G     | 2.51        | 0.189            | -0.04        | 1.000            | -0.58        | 0.999            |
| Winter | Daytime     | F     | H     | 0.40        | 1.000            | -2.09        | 0.421            | 0.41         | 1.000            |
| Winter | Daytime     | F     | C     | -0.19       | 1.000            | -1.52        | 0.796            | 1.78         | 0.637            |
| Winter | Daytime     | F     | B     | 1.74        | 0.658            | 1.69         | 0.692            | -2.31        | 0.290            |
| Winter | Daytime     | F     | E     | <b>7.30</b> | <b>&lt;0.001</b> | 0.07         | 1.000            | -0.90        | 0.986            |
| Winter | Daytime     | F     | A     | <b>4.34</b> | <b>&lt;0.001</b> | -0.01        | 1.000            | 2.19         | 0.355            |
| Winter | Daytime     | F     | D     | 1.52        | 0.795            | 2.80         | 0.094            | -0.21        | 1.000            |
| Winter | Daytime     | G     | H     | -1.75       | 0.657            | -1.89        | 0.555            | 0.93         | 0.983            |
| Winter | Daytime     | G     | C     | -2.16       | 0.378            | -1.38        | 0.864            | 2.22         | 0.340            |
| Winter | Daytime     | G     | B     | -0.25       | 1.000            | 1.64         | 0.729            | -1.73        | 0.665            |
| Winter | Daytime     | G     | E     | <b>4.42</b> | <b>&lt;0.001</b> | 0.10         | 1.000            | -0.31        | 1.000            |
| Winter | Daytime     | G     | A     | 1.89        | 0.559            | 0.03         | 1.000            | 2.64         | 0.141            |
| Winter | Daytime     | G     | D     | -0.75       | 0.995            | 2.56         | 0.173            | 0.32         | 1.000            |
| Winter | Daytime     | H     | C     | -0.55       | 0.999            | 0.37         | 1.000            | 1.36         | 0.877            |
| Winter | Daytime     | H     | B     | 1.36        | 0.876            | <b>3.39</b>  | <b>0.016</b>     | -2.64        | 0.141            |
| Winter | Daytime     | H     | E     | <b>7.38</b> | <b>&lt;0.001</b> | 2.64         | 0.142            | -1.37        | 0.869            |
| Winter | Daytime     | H     | A     | <b>3.83</b> | <b>0.003</b>     | 2.08         | 0.427            | 1.74         | 0.658            |
| Winter | Daytime     | H     | D     | 1.05        | 0.966            | <b>4.72</b>  | <b>&lt;0.001</b> | -0.60        | 0.999            |
| Winter | Daytime     | C     | B     | 1.77        | 0.639            | 2.84         | 0.086            | <b>-3.81</b> | <b>0.003</b>     |

|           |           |   |   |              |                  |              |                  |              |                  |
|-----------|-----------|---|---|--------------|------------------|--------------|------------------|--------------|------------------|
| Winter    | Daytime   | C | E | <b>6.60</b>  | <b>&lt;0.001</b> | 1.65         | 0.721            | -2.64        | 0.143            |
| Winter    | Daytime   | C | A | <b>4.07</b>  | <b>0.001</b>     | 1.49         | 0.813            | 0.30         | 1.000            |
| Winter    | Daytime   | C | D | 1.71         | 0.679            | <b>4.50</b>  | <b>&lt;0.001</b> | -2.03        | 0.461            |
| Winter    | Daytime   | B | E | <b>4.31</b>  | <b>&lt;0.001</b> | -1.70        | 0.688            | 1.52         | 0.799            |
| Winter    | Daytime   | B | A | 2.01         | 0.477            | -1.70        | 0.689            | <b>4.29</b>  | <b>&lt;0.001</b> |
| Winter    | Daytime   | B | D | -0.43        | 1.000            | 0.56         | 0.999            | 2.04         | 0.455            |
| Winter    | Daytime   | E | A | -2.66        | 0.134            | -0.08        | 1.000            | 3.15         | 0.035            |
| Winter    | Daytime   | E | D | <b>-5.67</b> | <b>&lt;0.001</b> | 2.93         | 0.067            | 0.67         | 0.998            |
| Winter    | Daytime   | A | D | -2.78        | 0.101            | 2.72         | 0.117            | -2.32        | 0.284            |
| Temperate | Nighttime | F | G | <b>-4.39</b> | <b>&lt;0.001</b> | 0.28         | 1.000            | -2.88        | 0.076            |
| Temperate | Nighttime | F | H | <b>-6.15</b> | <b>&lt;0.001</b> | <b>-3.16</b> | <b>0.034</b>     | -2.02        | 0.470            |
| Temperate | Nighttime | F | C | -0.34        | 1.000            | <b>-6.76</b> | <b>&lt;0.001</b> | 2.31         | 0.290            |
| Temperate | Nighttime | F | B | 0.05         | 1.000            | 0.88         | 0.988            | -1.43        | 0.845            |
| Temperate | Nighttime | F | E | -2.60        | 0.158            | <b>4.02</b>  | <b>0.002</b>     | <b>-5.51</b> | <b>&lt;0.001</b> |
| Temperate | Nighttime | F | A | <b>-3.40</b> | <b>0.015</b>     | -1.52        | 0.798            | -0.87        | 0.989            |
| Temperate | Nighttime | F | D | <b>-3.21</b> | <b>0.029</b>     | 1.02         | 0.972            | -1.44        | 0.837            |
| Temperate | Nighttime | G | H | -1.78        | 0.636            | <b>-3.20</b> | <b>0.031</b>     | 0.85         | 0.990            |
| Temperate | Nighttime | G | C | <b>3.54</b>  | <b>0.010</b>     | <b>-6.63</b> | <b>&lt;0.001</b> | <b>5.01</b>  | <b>&lt;0.001</b> |
| Temperate | Nighttime | G | B | <b>3.63</b>  | <b>0.007</b>     | 0.64         | 0.998            | 1.26         | 0.913            |
| Temperate | Nighttime | G | E | 1.72         | 0.671            | <b>3.42</b>  | <b>0.014</b>     | -2.54        | 0.179            |
| Temperate | Nighttime | G | A | 0.56         | 0.999            | -1.67        | 0.707            | 1.75         | 0.651            |
| Temperate | Nighttime | G | D | 1.51         | 0.800            | 0.60         | 0.999            | 1.57         | 0.771            |
| Temperate | Nighttime | H | C | <b>5.58</b>  | <b>&lt;0.001</b> | <b>-3.90</b> | <b>0.003</b>     | <b>4.33</b>  | <b>&lt;0.001</b> |
| Temperate | Nighttime | H | B | <b>5.48</b>  | <b>&lt;0.001</b> | <b>3.55</b>  | <b>0.009</b>     | 0.48         | 1.000            |
| Temperate | Nighttime | H | E | <b>3.97</b>  | <b>0.002</b>     | <b>7.80</b>  | <b>&lt;0.001</b> | <b>-3.57</b> | <b>0.009</b>     |
| Temperate | Nighttime | H | A | 2.38         | 0.249            | 1.46         | 0.827            | 1.00         | 0.974            |
| Temperate | Nighttime | H | D | <b>3.72</b>  | <b>0.005</b>     | <b>4.55</b>  | <b>&lt;0.001</b> | 0.72         | 0.996            |
| Temperate | Nighttime | C | B | 0.36         | 1.000            | <b>6.69</b>  | <b>&lt;0.001</b> | <b>-3.62</b> | <b>0.007</b>     |
| Temperate | Nighttime | C | E | -2.16        | 0.380            | <b>11.26</b> | <b>&lt;0.001</b> | <b>-7.80</b> | <b>&lt;0.001</b> |
| Temperate | Nighttime | C | A | <b>-3.51</b> | <b>0.011</b>     | <b>6.27</b>  | <b>&lt;0.001</b> | <b>-3.26</b> | <b>0.025</b>     |
| Temperate | Nighttime | C | D | -2.46        | 0.214            | <b>8.22</b>  | <b>&lt;0.001</b> | <b>-3.76</b> | <b>0.004</b>     |
| Temperate | Nighttime | B | E | -2.29        | 0.298            | 2.35         | 0.267            | <b>-3.77</b> | <b>0.004</b>     |
| Temperate | Nighttime | B | A | <b>-3.11</b> | <b>0.040</b>     | -2.16        | 0.374            | 0.51         | 1.000            |
| Temperate | Nighttime | B | D | -2.61        | 0.153            | -0.18        | 1.000            | 0.18         | 1.000            |
| Temperate | Nighttime | E | A | -1.17        | 0.942            | <b>-5.66</b> | <b>&lt;0.001</b> | <b>4.31</b>  | <b>&lt;0.001</b> |
| Temperate | Nighttime | E | D | -0.35        | 1.000            | <b>-3.84</b> | <b>0.003</b>     | <b>4.60</b>  | <b>&lt;0.001</b> |
| Temperate | Nighttime | A | D | 0.87         | 0.989            | 2.54         | 0.181            | -0.38        | 1.000            |
| Temperate | Daytime   | F | G | -1.25        | 0.917            | 0.61         | 0.999            | -2.20        | 0.354            |
| Temperate | Daytime   | F | H | <b>-3.49</b> | <b>0.012</b>     | <b>-4.06</b> | <b>0.001</b>     | 0.55         | 0.999            |
| Temperate | Daytime   | F | C | -0.09        | 1.000            | <b>-3.36</b> | <b>0.018</b>     | 2.40         | 0.241            |
| Temperate | Daytime   | F | B | -0.01        | 1.000            | 0.95         | 0.981            | -1.23        | 0.922            |
| Temperate | Daytime   | F | E | 1.88         | 0.564            | <b>4.38</b>  | <b>&lt;0.001</b> | <b>-4.78</b> | <b>&lt;0.001</b> |
| Temperate | Daytime   | F | A | 1.19         | 0.935            | -1.54        | 0.785            | 1.93         | 0.531            |
| Temperate | Daytime   | F | D | -1.45        | 0.836            | 2.57         | 0.166            | -1.10        | 0.956            |
| Temperate | Daytime   | G | H | -2.16        | 0.378            | <b>-4.34</b> | <b>&lt;0.001</b> | 2.69         | 0.125            |
| Temperate | Daytime   | G | C | 1.02         | 0.972            | <b>-3.70</b> | <b>0.005</b>     | <b>4.45</b>  | <b>&lt;0.001</b> |
| Temperate | Daytime   | G | B | 1.00         | 0.974            | 0.45         | 1.000            | 0.82         | 0.992            |
| Temperate | Daytime   | G | E | 2.94         | 0.065            | <b>3.45</b>  | <b>0.013</b>     | -2.50        | 0.196            |
| Temperate | Daytime   | G | A | 2.23         | 0.337            | -1.97        | 0.503            | <b>3.89</b>  | <b>0.003</b>     |
| Temperate | Daytime   | G | D | -0.04        | 1.000            | 1.62         | 0.741            | 1.19         | 0.935            |
| Temperate | Daytime   | H | C | <b>3.28</b>  | <b>0.024</b>     | 0.44         | 1.000            | 1.90         | 0.552            |
| Temperate | Daytime   | H | B | <b>3.06</b>  | <b>0.046</b>     | <b>4.37</b>  | <b>&lt;0.001</b> | -1.78        | 0.634            |

|           |           |   |   |              |                  |              |                  |              |                  |
|-----------|-----------|---|---|--------------|------------------|--------------|------------------|--------------|------------------|
| Temperate | Daytime   | H | E | <b>5.78</b>  | <b>&lt;0.001</b> | <b>9.19</b>  | <b>&lt;0.001</b> | <b>-5.48</b> | <b>&lt;0.001</b> |
| Temperate | Daytime   | H | A | <b>4.54</b>  | <b>&lt;0.001</b> | 2.31         | 0.289            | 1.44         | 0.837            |
| Temperate | Daytime   | H | D | 2.47         | 0.207            | <b>7.06</b>  | <b>&lt;0.001</b> | -1.66        | 0.712            |
| Temperate | Daytime   | C | B | 0.06         | 1.000            | <b>3.82</b>  | <b>0.003</b>     | <b>-3.52</b> | <b>0.010</b>     |
| Temperate | Daytime   | C | E | 1.92         | 0.536            | <b>7.90</b>  | <b>&lt;0.001</b> | -7.17        | <0.001           |
| Temperate | Daytime   | C | A | 1.46         | 0.829            | 2.18         | 0.364            | -0.37        | 1.000            |
| Temperate | Daytime   | C | D | -1.18        | 0.938            | <b>5.85</b>  | <b>&lt;0.001</b> | <b>-3.54</b> | <b>0.010</b>     |
| Temperate | Daytime   | B | E | 1.64         | 0.728            | 2.58         | 0.165            | <b>-3.27</b> | <b>0.024</b>     |
| Temperate | Daytime   | B | A | 1.08         | 0.961            | -2.24        | 0.325            | 3.02         | 0.052            |
| Temperate | Daytime   | B | D | -1.13        | 0.950            | 0.89         | 0.987            | 0.29         | 1.000            |
| Temperate | Daytime   | E | A | -0.55        | 0.999            | <b>-6.04</b> | <b>&lt;0.001</b> | <b>6.51</b>  | <b>&lt;0.001</b> |
| Temperate | Daytime   | E | D | <b>-3.79</b> | <b>0.004</b>     | -2.58        | 0.165            | <b>4.14</b>  | <b>0.001</b>     |
| Temperate | Daytime   | A | D | -2.54        | 0.179            | <b>3.89</b>  | <b>0.003</b>     | -2.99        | 0.057            |
| Summer    | Nighttime | F | G | 1.20         | 0.933            | 0.35         | 1.000            | -0.74        | 0.996            |
| Summer    | Nighttime | F | H | 0.45         | 1.000            | -2.85        | 0.084            | -0.46        | 1.000            |
| Summer    | Nighttime | F | C | -0.22        | 1.000            | <b>-5.69</b> | <b>&lt;0.001</b> | 1.99         | 0.486            |
| Summer    | Nighttime | F | B | 1.28         | 0.907            | 0.95         | 0.981            | -1.42        | 0.847            |
| Summer    | Nighttime | F | E | 0.59         | 0.999            | 2.73         | 0.114            | -2.99        | 0.056            |
| Summer    | Nighttime | F | A | -0.05        | 1.000            | 0.19         | 1.000            | -0.83        | 0.991            |
| Summer    | Nighttime | F | D | -1.75        | 0.654            | 1.73         | 0.669            | -1.53        | 0.791            |
| Summer    | Nighttime | G | H | -0.66        | 0.998            | -2.98        | 0.059            | 0.26         | 1.000            |
| Summer    | Nighttime | G | C | -1.27        | 0.911            | <b>-5.68</b> | <b>&lt;0.001</b> | 2.67         | 0.133            |
| Summer    | Nighttime | G | B | 0.26         | 1.000            | 0.64         | 0.998            | -0.71        | 0.997            |
| Summer    | Nighttime | G | E | -0.59        | 0.999            | 2.17         | 0.370            | -2.18        | 0.363            |
| Summer    | Nighttime | G | A | -1.14        | 0.949            | -0.13        | 1.000            | -0.10        | 1.000            |
| Summer    | Nighttime | G | D | -2.75        | 0.110            | 1.19         | 0.934            | -0.72        | 0.996            |
| Summer    | Nighttime | H | C | -0.66        | 0.998            | -3.03        | 0.050            | 2.45         | 0.219            |
| Summer    | Nighttime | H | B | 0.89         | 0.987            | <b>3.35</b>  | <b>0.018</b>     | -0.98        | 0.978            |
| Summer    | Nighttime | H | E | 0.11         | 1.000            | <b>6.11</b>  | <b>&lt;0.001</b> | -2.54        | 0.178            |
| Summer    | Nighttime | H | A | -0.50        | 1.000            | <b>3.04</b>  | <b>0.049</b>     | -0.37        | 1.000            |
| Summer    | Nighttime | H | D | -2.21        | 0.348            | <b>4.86</b>  | <b>&lt;0.001</b> | -1.02        | 0.972            |
| Summer    | Nighttime | C | B | 1.45         | 0.835            | <b>5.83</b>  | <b>&lt;0.001</b> | <b>-3.31</b> | <b>0.021</b>     |
| Summer    | Nighttime | C | E | 0.81         | 0.993            | <b>8.89</b>  | <b>&lt;0.001</b> | <b>-5.01</b> | <b>&lt;0.001</b> |
| Summer    | Nighttime | C | A | 0.20         | 1.000            | <b>7.41</b>  | <b>&lt;0.001</b> | <b>-3.06</b> | <b>0.047</b>     |
| Summer    | Nighttime | C | D | -1.36        | 0.874            | <b>7.64</b>  | <b>&lt;0.001</b> | <b>-3.52</b> | <b>0.010</b>     |
| Summer    | Nighttime | B | E | -0.82        | 0.992            | 1.23         | 0.924            | -1.38        | 0.866            |
| Summer    | Nighttime | B | A | -1.33        | 0.888            | -0.79        | 0.994            | 0.63         | 0.998            |
| Summer    | Nighttime | B | D | -2.78        | 0.101            | 0.34         | 1.000            | 0.04         | 1.000            |
| Summer    | Nighttime | E | A | -0.67        | 0.998            | -2.62        | 0.148            | 2.18         | 0.365            |
| Summer    | Nighttime | E | D | -2.66        | 0.134            | -1.34        | 0.884            | 1.64         | 0.723            |
| Summer    | Nighttime | A | D | -1.62        | 0.741            | 1.42         | 0.848            | -0.64        | 0.998            |
| Summer    | Daytime   | F | G | 1.68         | 0.700            | 0.21         | 1.000            | -0.80        | 0.993            |
| Summer    | Daytime   | F | H | <b>3.06</b>  | <b>0.046</b>     | -1.83        | 0.601            | 1.45         | 0.835            |
| Summer    | Daytime   | F | C | 0.77         | 0.994            | -1.98        | 0.494            | 1.77         | 0.637            |
| Summer    | Daytime   | F | B | <b>4.36</b>  | <b>&lt;0.001</b> | 1.75         | 0.652            | 0.77         | 0.994            |
| Summer    | Daytime   | F | E | <b>5.39</b>  | <b>&lt;0.001</b> | <b>4.22</b>  | <b>0.001</b>     | -2.03        | 0.459            |
| Summer    | Daytime   | F | A | 2.37         | 0.257            | -0.02        | 1.000            | 1.32         | 0.890            |
| Summer    | Daytime   | F | D | -0.93        | 0.983            | 2.53         | 0.183            | -1.22        | 0.925            |
| Summer    | Daytime   | G | H | 1.38         | 0.867            | -1.90        | 0.552            | 2.18         | 0.361            |
| Summer    | Daytime   | G | C | -0.74        | 0.996            | -2.06        | 0.443            | 2.50         | 0.196            |
| Summer    | Daytime   | G | B | 2.85         | 0.084            | 1.52         | 0.796            | 1.49         | 0.810            |
| Summer    | Daytime   | G | E | <b>3.44</b>  | <b>0.014</b>     | <b>3.66</b>  | <b>0.006</b>     | -1.20        | 0.934            |

|        |         |   |   |              |                  |              |                  |              |              |
|--------|---------|---|---|--------------|------------------|--------------|------------------|--------------|--------------|
| Summer | Daytime | G | A | 0.73         | 0.996            | -0.21        | 1.000            | 2.07         | 0.434        |
| Summer | Daytime | G | D | -2.47        | 0.210            | 2.03         | 0.460            | -0.38        | 1.000        |
| Summer | Daytime | H | C | -2.18        | 0.365            | -0.26        | 1.000            | 0.35         | 1.000        |
| Summer | Daytime | H | B | 1.68         | 0.700            | <b>3.30</b>  | <b>0.022</b>     | -0.61        | 0.999        |
| Summer | Daytime | H | E | 2.22         | 0.338            | <b>6.52</b>  | <b>&lt;0.001</b> | <b>-3.57</b> | <b>0.009</b> |
| Summer | Daytime | H | A | -0.68        | 0.998            | 1.80         | 0.618            | -0.13        | 1.000        |
| Summer | Daytime | H | D | <b>-4.25</b> | <b>0.001</b>     | <b>4.51</b>  | <b>&lt;0.001</b> | -2.71        | 0.120        |
| Summer | Daytime | C | B | <b>3.57</b>  | <b>0.009</b>     | <b>3.42</b>  | <b>0.015</b>     | -0.94        | 0.982        |
| Summer | Daytime | C | E | <b>4.40</b>  | <b>&lt;0.001</b> | <b>6.25</b>  | <b>&lt;0.001</b> | <b>-3.84</b> | <b>0.003</b> |
| Summer | Daytime | C | A | 1.81         | 0.613            | 2.47         | 0.207            | -0.52        | 1.000        |
| Summer | Daytime | C | D | -1.67        | 0.708            | <b>4.38</b>  | <b>&lt;0.001</b> | -3.00        | 0.055        |
| Summer | Daytime | B | E | 0.10         | 1.000            | 1.59         | 0.755            | -2.71        | 0.119        |
| Summer | Daytime | B | A | -2.27        | 0.309            | -1.78        | 0.637            | 0.49         | 1.000        |
| Summer | Daytime | B | D | <b>-5.32</b> | <b>&lt;0.001</b> | 0.11         | 1.000            | -1.93        | 0.531        |
| Summer | Daytime | E | A | -2.95        | 0.063            | <b>-4.41</b> | <b>&lt;0.001</b> | <b>3.46</b>  | <b>0.013</b> |
| Summer | Daytime | E | D | <b>-7.40</b> | <b>&lt;0.001</b> | -2.23        | 0.332            | 0.92         | 0.984        |
| Summer | Daytime | A | D | <b>-3.42</b> | <b>0.015</b>     | 2.40         | 0.240            | -2.57        | 0.167        |

---
