# Supplementary material for: Dairy Cow Behavior Is Affected by Period, Time of Day and Housing
Source: MDPI journal article supplement (doi:10.3390/ani12040512), 2022-02-18
Supplement: s1 [file s1]

Table S2:  $t$ - and  $p$ -values of the pairwise comparisons of periods for each farm (Tukey-Kramer test, slice-option). Significant differences ( $p < 0.05$ ) are highlighted in bold.

| Farm | Time of day | Period1   | Period2 | DLT           |                  | NLB          |                  | MLBD         |                  |
|------|-------------|-----------|---------|---------------|------------------|--------------|------------------|--------------|------------------|
|      |             |           |         | $t$           | $p$              | $t$          | $p$              | $t$          | $p$              |
| F    | Night       | Temperate | Summer  | <b>-4.70</b>  | <b>&lt;0.001</b> | -0.56        | 0.839            | -1.02        | 0.564            |
| F    | Night       | Temperate | Winter  | <b>-10.87</b> | <b>&lt;0.001</b> | -0.67        | 0.778            | <b>-3.70</b> | <b>0.001</b>     |
| F    | Night       | Summer    | Winter  | <b>-6.58</b>  | <b>&lt;0.001</b> | -0.16        | 0.986            | <b>-2.76</b> | <b>0.016</b>     |
| G    | Night       | Temperate | Summer  | <b>4.41</b>   | <b>&lt;0.001</b> | -0.43        | 0.905            | 1.97         | 0.120            |
| G    | Night       | Temperate | Winter  | -1.49         | 0.296            | 0.12         | 0.992            | <b>-2.37</b> | <b>0.047</b>     |
| G    | Night       | Summer    | Winter  | <b>-5.93</b>  | <b>&lt;0.001</b> | 0.55         | 0.846            | <b>-4.38</b> | <b>&lt;0.001</b> |
| H    | Night       | Temperate | Summer  | <b>5.75</b>   | <b>&lt;0.001</b> | -0.06        | 0.998            | 1.05         | 0.544            |
| H    | Night       | Temperate | Winter  | <b>-2.77</b>  | <b>0.015</b>     | <b>2.55</b>  | <b>0.029</b>     | <b>-3.79</b> | <b>&lt;0.001</b> |
| H    | Night       | Summer    | Winter  | <b>-7.38</b>  | <b>&lt;0.001</b> | <b>2.48</b>  | <b>0.036</b>     | <b>-4.54</b> | <b>&lt;0.001</b> |
| C    | Night       | Temperate | Summer  | <b>-4.37</b>  | <b>&lt;0.001</b> | 1.48         | 0.300            | -1.45        | 0.317            |
| C    | Night       | Temperate | Winter  | <b>-3.57</b>  | <b>0.001</b>     | <b>3.39</b>  | <b>0.002</b>     | -2.11        | 0.088            |
| C    | Night       | Summer    | Winter  | -1.27         | 0.415            | <b>2.68</b>  | <b>0.020</b>     | -1.15        | 0.482            |
| B    | Night       | Temperate | Summer  | <b>-2.31</b>  | <b>0.054</b>     | -0.42        | 0.906            | -1.01        | 0.570            |
| B    | Night       | Temperate | Winter  | <b>-11.37</b> | <b>&lt;0.001</b> | 2.25         | 0.064            | <b>-6.52</b> | <b>&lt;0.001</b> |
| B    | Night       | Summer    | Winter  | <b>-9.24</b>  | <b>&lt;0.001</b> | <b>2.64</b>  | <b>0.023</b>     | <b>-5.58</b> | <b>&lt;0.001</b> |
| E    | Night       | Temperate | Summer  | 0.46          | 0.888            | <b>-2.77</b> | <b>0.016</b>     | <b>2.49</b>  | <b>0.034</b>     |
| E    | Night       | Temperate | Winter  | <b>-3.93</b>  | <b>&lt;0.001</b> | <b>-7.43</b> | <b>&lt;0.001</b> | -0.64        | 0.799            |
| E    | Night       | Summer    | Winter  | <b>-4.41</b>  | <b>&lt;0.001</b> | <b>-5.55</b> | <b>&lt;0.001</b> | <b>-2.73</b> | <b>0.018</b>     |
| A    | Night       | Temperate | Summer  | 1.17          | 0.468            | 2.34         | 0.050            | -0.76        | 0.730            |
| A    | Night       | Temperate | Winter  | <b>-3.16</b>  | <b>0.005</b>     | <b>3.00</b>  | <b>0.008</b>     | <b>-2.59</b> | <b>0.026</b>     |
| A    | Night       | Summer    | Winter  | <b>-4.59</b>  | <b>&lt;0.001</b> | 1.09         | 0.521            | -2.12        | 0.086            |
| D    | Night       | Temperate | Summer  | <b>-2.57</b>  | <b>0.028</b>     | 0.64         | 0.798            | -1.16        | 0.475            |
| D    | Night       | Temperate | Winter  | <b>-3.69</b>  | <b>0.001</b>     | 2.33         | 0.052            | <b>-2.78</b> | <b>0.015</b>     |
| D    | Night       | Summer    | Winter  | -1.71         | 0.201            | 1.83         | 0.158            | -1.81        | 0.166            |
| F    | Day         | Temperate | Summer  | -1.57         | 0.259            | -0.04        | 0.999            | -0.02        | 1.000            |
| F    | Day         | Temperate | Winter  | <b>-7.04</b>  | <b>&lt;0.001</b> | 0.62         | 0.810            | <b>-3.03</b> | <b>0.007</b>     |
| F    | Day         | Summer    | Winter  | <b>-5.61</b>  | <b>&lt;0.001</b> | 0.66         | 0.788            | <b>-3.01</b> | <b>0.007</b>     |
| G    | Day         | Temperate | Summer  | <b>3.18</b>   | <b>0.004</b>     | -0.72        | 0.754            | 1.92         | 0.132            |
| G    | Day         | Temperate | Winter  | -1.72         | 0.198            | -0.43        | 0.902            | -0.92        | 0.628            |
| G    | Day         | Summer    | Winter  | <b>-4.93</b>  | <b>&lt;0.001</b> | 0.27         | 0.959            | <b>-2.86</b> | <b>0.012</b>     |
| H    | Day         | Temperate | Summer  | <b>8.52</b>   | <b>&lt;0.001</b> | <b>3.54</b>  | <b>0.001</b>     | 1.16         | 0.478            |
| H    | Day         | Temperate | Winter  | -0.88         | 0.654            | <b>3.18</b>  | <b>0.004</b>     | <b>-2.83</b> | <b>0.013</b>     |
| H    | Day         | Summer    | Winter  | <b>-7.85</b>  | <b>&lt;0.001</b> | 0.16         | 0.986            | <b>-3.71</b> | <b>0.001</b>     |
| C    | Day         | Temperate | Summer  | -0.03         | 1.000            | <b>2.58</b>  | <b>0.027</b>     | -0.92        | 0.629            |
| C    | Day         | Temperate | Winter  | <b>-4.07</b>  | <b>&lt;0.001</b> | 1.93         | 0.131            | <b>-2.67</b> | <b>0.021</b>     |
| C    | Day         | Summer    | Winter  | <b>-4.06</b>  | <b>&lt;0.001</b> | 0.70         | 0.765            | -2.06        | 0.098            |
| B    | Day         | Temperate | Summer  | <b>6.96</b>   | <b>&lt;0.001</b> | 1.73         | 0.193            | <b>2.99</b>  | <b>0.008</b>     |
| B    | Day         | Temperate | Winter  | <b>-3.99</b>  | <b>&lt;0.001</b> | 2.11         | 0.087            | <b>-4.53</b> | <b>&lt;0.001</b> |
| B    | Day         | Summer    | Winter  | <b>-10.41</b> | <b>&lt;0.001</b> | 0.52         | 0.863            | <b>-7.31</b> | <b>&lt;0.001</b> |
| E    | Day         | Temperate | Summer  | <b>3.98</b>   | <b>&lt;0.001</b> | -0.36        | 0.930            | <b>3.78</b>  | <b>&lt;0.001</b> |
| E    | Day         | Temperate | Winter  | 0.48          | 0.879            | <b>-4.93</b> | <b>&lt;0.001</b> | 1.75         | 0.185            |
| E    | Day         | Summer    | Winter  | <b>-2.63</b>  | <b>0.023</b>     | <b>-4.81</b> | <b>&lt;0.001</b> | -1.34        | 0.371            |
| A    | Day         | Temperate | Summer  | 0.31          | 0.947            | <b>2.49</b>  | <b>0.034</b>     | -0.94        | 0.617            |
| A    | Day         | Temperate | Winter  | -1.91         | 0.135            | <b>2.68</b>  | <b>0.020</b>     | <b>-2.36</b> | <b>0.048</b>     |
| A    | Day         | Summer    | Winter  | <b>-2.41</b>  | <b>0.043</b>     | 0.60         | 0.820            | -1.70        | 0.206            |
| D    | Day         | Temperate | Summer  | -0.84         | 0.677            | 0.10         | 0.994            | -0.23        | 0.970            |
| D    | Day         | Temperate | Winter  | -2.25         | 0.064            | 1.19         | 0.459            | -1.67        | 0.218            |

|   |     |        |        |       |       |      |       |       |       |
|---|-----|--------|--------|-------|-------|------|-------|-------|-------|
| D | Day | Summer | Winter | -1.59 | 0.251 | 1.10 | 0.512 | -1.46 | 0.309 |
|---|-----|--------|--------|-------|-------|------|-------|-------|-------|

---
